# Supplementary material for: Effect of continuous positive airway pressure treatment on permeability, inflammation and mucus production of human epithelial cells
Source: PubMed Central journal article supplement — ERJ Open Res. 2020 Jun 8;6(2):00327-2019. doi: 10.1183/23120541.00327-2019 (PMC7276533; doi:10.1183/23120541.00327-2019), 2020-06-08
Supplement: 00327-2019.SUPPLEMENT.pdf [file 00327-2019.SUPPLEMENT.pdf]

## Additional Information

Table 1 Materials Sources

| Materials                                                                                                   | Source                                  |
|-------------------------------------------------------------------------------------------------------------|-----------------------------------------|
| Minimum Essential Medium and Dulbecco's Modified Eagle's medium/F-12 (x100)                                 | Life Technologies (Sydney, Australia)   |
| Trypan blue solution (0.4%, w/v) and L-glutamine (200 mM)                                                   | Sigma-Aldrich (Sydney, Australia).      |
| Fluorescein-sodium (flu-Na)                                                                                 | May & Baker Ltd. (Dagenham, England).   |
| Fetal bovine serum (FBS), Hank's balanced salt solution (HBSS), and phosphate buffered saline (PBS)         | Gibco, Invitrogen (Sydney, Australia)   |
| Alcian blue 1% (pH 2.5) in 3% acetic acid                                                                   | Fronine laboratory (Sydney, Australia). |
| Transwell® cell culture inserts (0.33 cm <sup>2</sup> polyester, 0.4 µm pore size) and black 96-well plates | Corning Costar (Lowell, MA, USA)        |
| ELISA enzyme immunoassay kit                                                                                | BD Bioscience (Sydney, Australia).      |
| All chemicals and reagents were of the highest analytical grade.                                            |                                         |

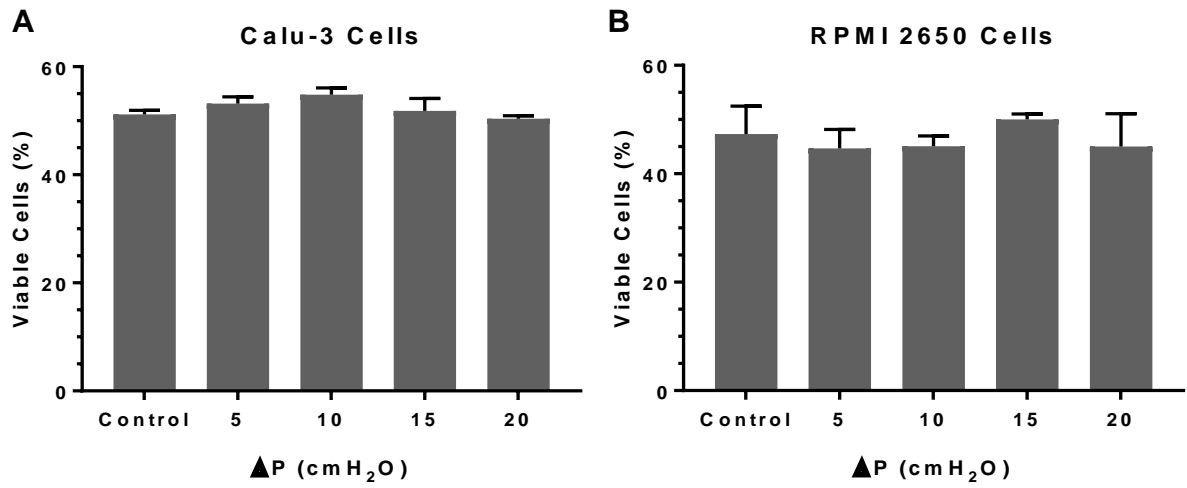

Figure 1. Viability of Calu-3 (A) and RPMI 2650 (B) cells after 5, 10, 15 and 20 cmH<sub>2</sub>O of PAP application for 8 hours with trypan blue exclusion test.

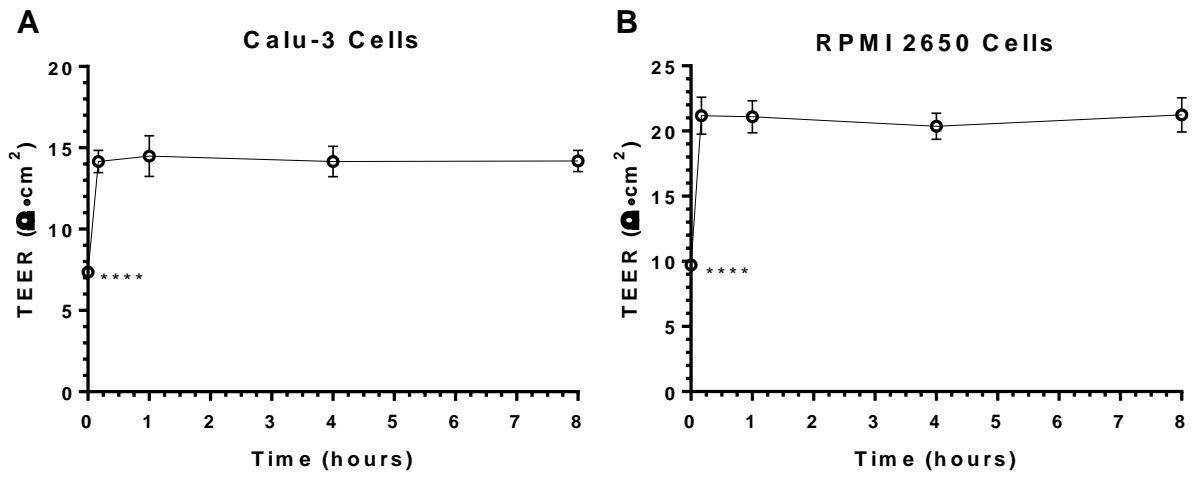

Figure 2. TEER measurements as a function of time cells at  $\Delta P=20$  cmH<sub>2</sub>O and 4000Hz using the holder. A. A- TEER measurements for Calu-3 cells. B- TEER measurements for RPMI 2650 cells.
